# Supplementary material
Source: PubMed Central journal article supplement (PMC6485358)
Supplement: jciinsight-4-120722-s046.pdf [file jciinsight-4-120722-s046.pdf]

## Supplementary Figure 1

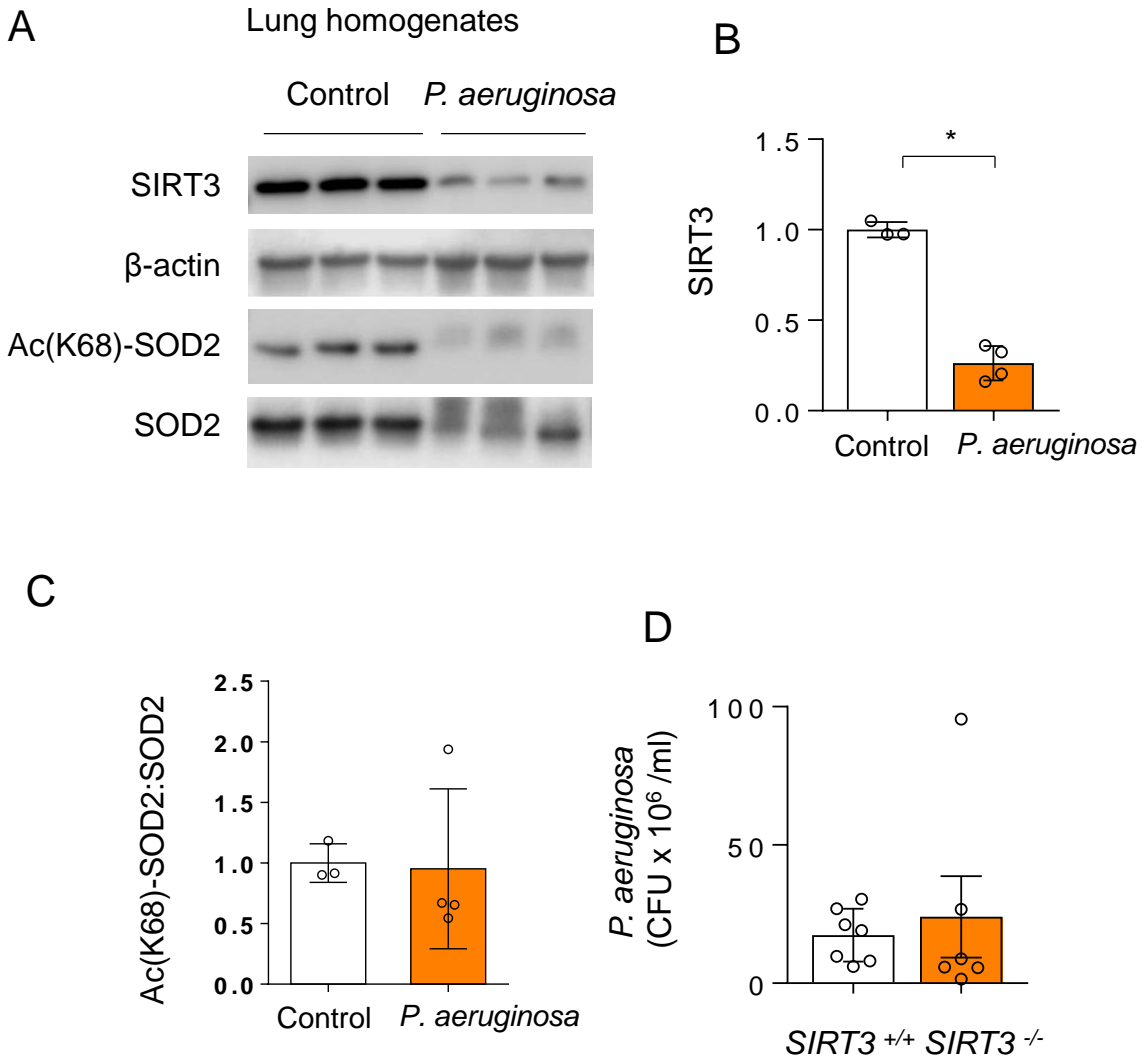

**Supplementary Figure 1.** SIRT3 is diminished in the lungs of mice subjected to *P. aeruginosa*-induced pneumonia. (**A**, **B**, **C**) Representative Western blots and optical band densitometry of SIRT3, Ac(K68)-SOD2 and total amounts of SOD2 from lung homogenates of control or mice subjected to *P. aeruginosa* (strain K; i.t.) for 4 hours. Means  $\pm$  s.e.m.,  $n = 3-4$ ,  $*P < 0.05$ . (**D**) Colony forming units (CFU) of *P. aeruginosa* in the lung homogenates of control and infected mice. Means  $\pm$  s.e.m.,  $n = 6-7$  mice per group;  $*P < 0.05$ .

## Supplementary Figure 2

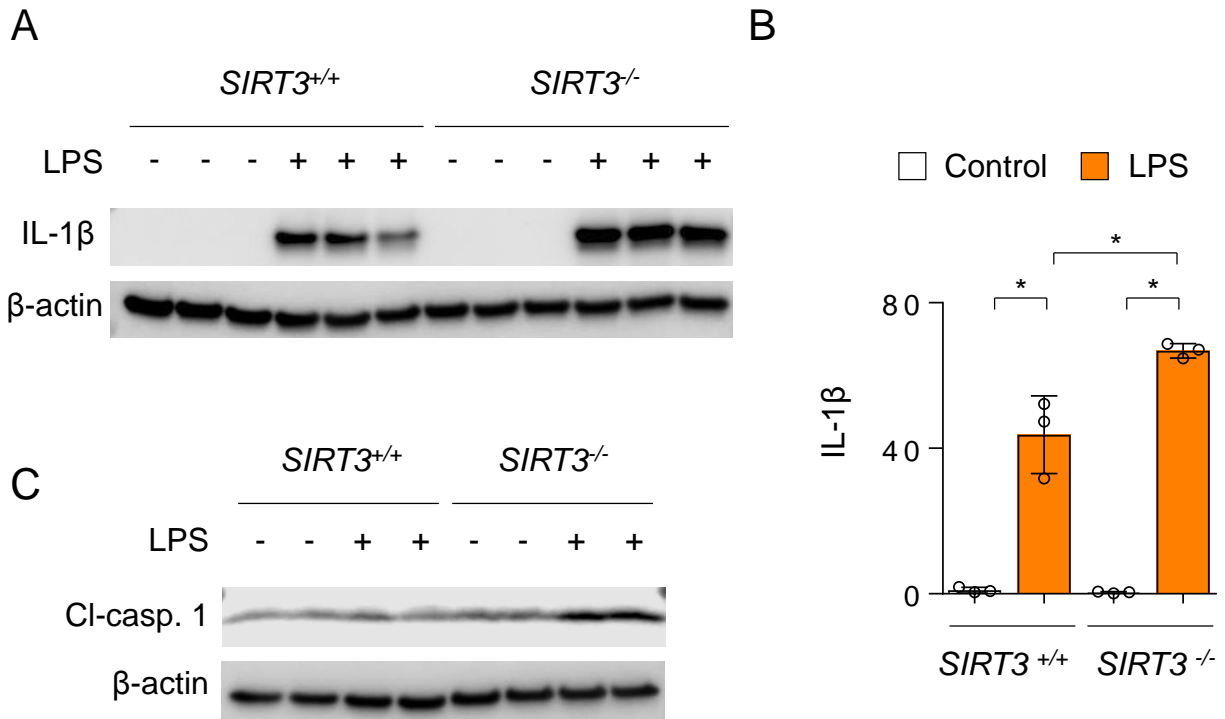

**Supplementary Figure 2.** SIRT3 deficiency is associated with enhanced production of IL-1 $\beta$ . **(A,B)** Representative western blots and optical band densitometry of IL-1 $\beta$  in lysates from wild-type and SIRT3 deficient peritoneal macrophages. Cells were treated with LPS (0 or 3 ng/ml) for 4 hours. Means  $\pm$  s.d.,  $n = 3$ ;  $*P < 0.05$  (ANOVA). **(C)** Representative immunoblots of cleaved caspase 1 (Cl-casp.1) and  $\beta$ -actin from wild-type or SIRT3 deficient peritoneal macrophages. Cells were treated with or without LPS, as indicated.

### Supplementary Figure 3

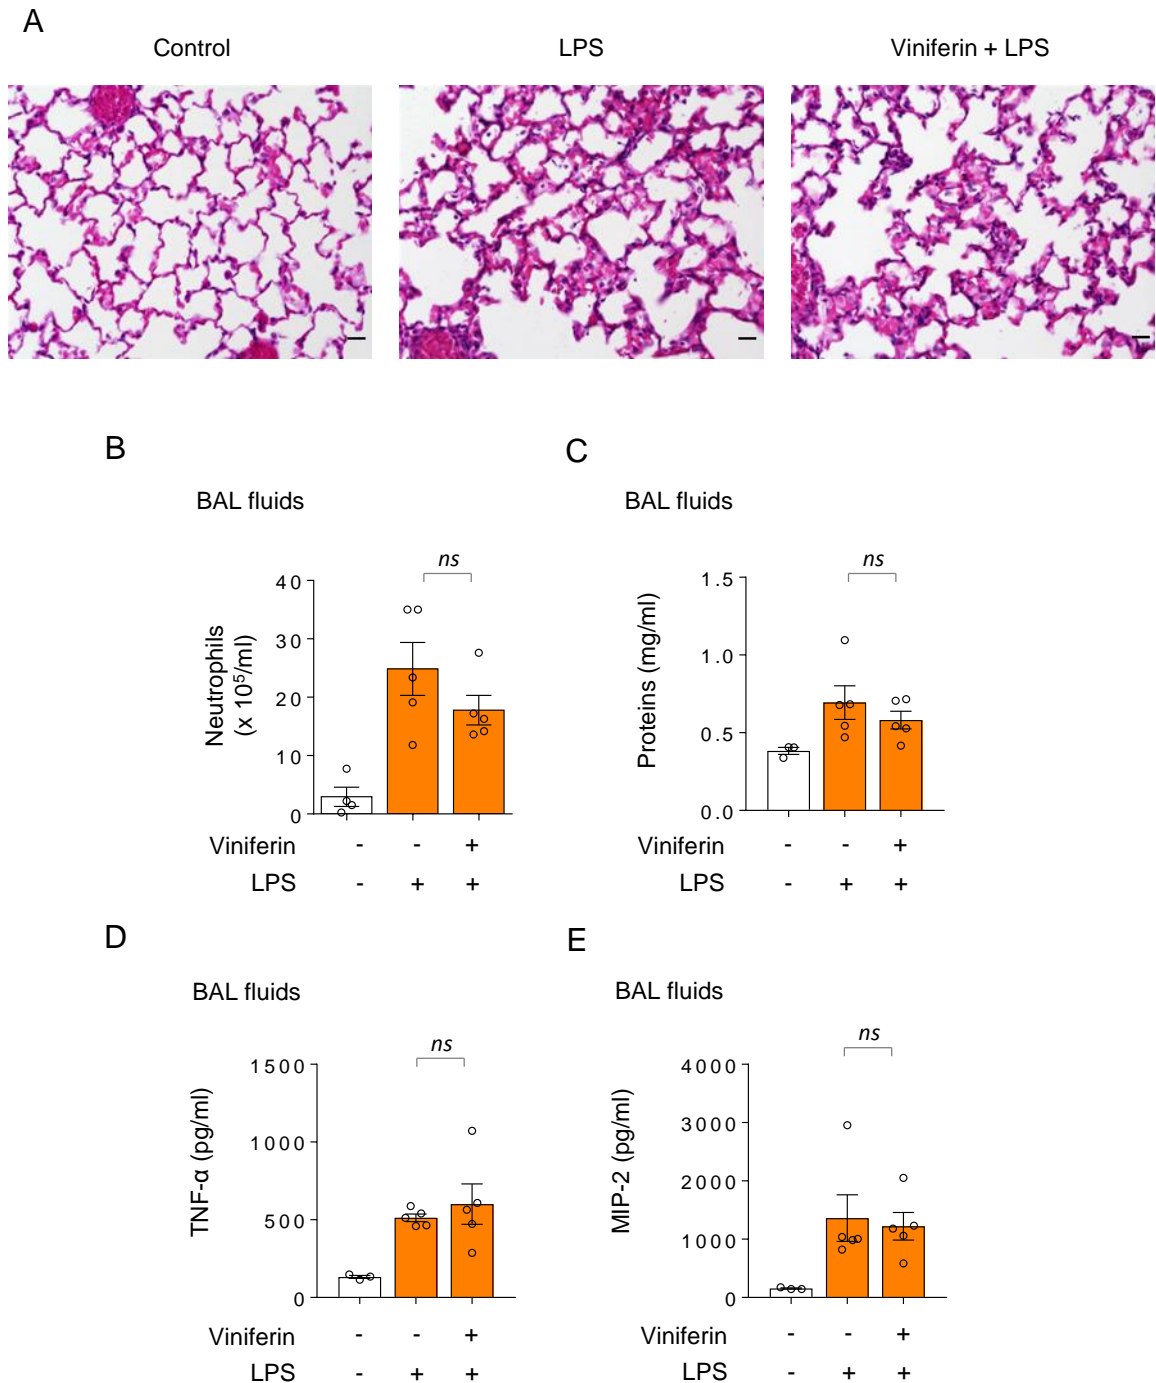

**Supplementary Figure 3.** Lung protective and anti-inflammatory effects of viniferin are absent in *SIRT3*<sup>-/-</sup> mice. **(A)** *SIRT3*<sup>-/-</sup> mice subjected to saline, LPS (3 mg/kg; i.t.) for 24 hours. Mice were also treated with/without viniferin (0 or 120 mg/kg, i.p.) once a day for 3 consecutive days prior to LPS exposure. Representative images show H&E staining of lung sections. Scale bar: 20  $\mu\text{m}$ . **(B,C)** neutrophil content **(B)**, protein amounts **(C)**, and TNF- $\alpha$  **(C)** and MIP-2 **(D)** cytokine levels were determined in bronchoalveolar lavage (BAL) fluids from *SIRT3*<sup>-/-</sup> mice subjected to LPS with/without viniferin treatment. Data presented as means  $\pm$  s.e.m.,  $n = 3-5$  mice per group; *ns* = not significant.

## Supplementary Figure 4

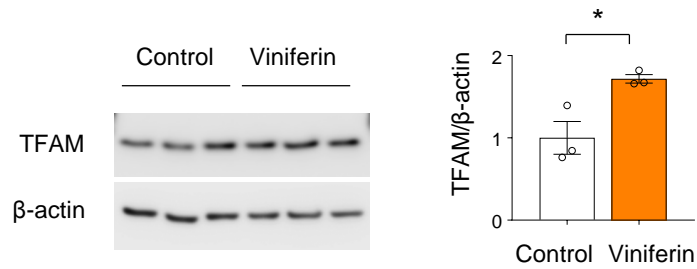

**Supplementary Figure 4.** Viniferin increases TFAM accumulation in macrophages. Representative western blots and optical band densitometry for TFAM and  $\beta$ -actin from macrophages treated with viniferin (0 or 1  $\mu$ M) for 24 hours. Means  $\pm$  s.e.m.,  $n = 3$ ,  $*P < 0.05$ .
